# Supplementary material for: Autologous stem-cell transplantation as consolidation of first-line chemotherapy in patients with peripheral T-cell lymphoma: a multicenter GELTAMO/FIL study
Source: PubMed Central journal article supplement — Haematologica. 2022 Mar 24;107(11):2675–84. doi: 10.3324/haematol.2021.279426 (PMC9614542; doi:10.3324/haematol.2021.279426), 2022-03-24
Supplement: 2021_279426_GARCIA-SANCHO_SUPPL.pdf [file 2021_279426_GARCIA-SANCHO_SUPPL.pdf]

# Autologous stem-cell transplantation as consolidation of first-line chemotherapy in patients with peripheral T-cell lymphoma: a multicenter GELTAMO/FIL study

Alejandro Martín García-Sancho,<sup>1</sup> Monica Bellei,<sup>2</sup> Miriam López-Parra,<sup>1</sup> Giuseppe Gritti,<sup>3</sup> María Cortés,<sup>4</sup> Silvana Novelli,<sup>5</sup> Carlos Panizo,<sup>6</sup> Luigi Petrucci,<sup>7</sup> Antonio Gutiérrez,<sup>8</sup> Ivan Dlouhy,<sup>9</sup> Mariana Bastos-Oreiro,<sup>10</sup> Juan M. Sancho,<sup>11</sup> María J. Ramírez,<sup>12</sup> José M. Moraleda,<sup>13</sup> Estrella Carrillo,<sup>14</sup> Ana I. Jiménez-Ubieto,<sup>15</sup> Isidro Jarque,<sup>16</sup> Lorella Orsucci,<sup>17</sup> Estefanía García-Torres,<sup>18</sup> Carlos Montalbán,<sup>19</sup> Anna Dodero,<sup>20</sup> Reyes Arranz,<sup>21</sup> Natalia de las Heras,<sup>22</sup> María J. Pascual,<sup>23</sup> Javier López-Jiménez,<sup>24</sup> Michelle Spina,<sup>25</sup> Alessandro Re,<sup>26</sup> Sonia González de Villambrosia,<sup>27</sup> Sabela Bobillo,<sup>28</sup> Massimo Federico<sup>29</sup> and Dolores Caballero<sup>1</sup> on behalf of the Grupo Español de Linfomas y Trasplante Autólogo de Médula Ósea (GELTAMO) and Fondazione Italiana Linfomi (FIL)

<sup>1</sup>Department of Hematology, Hospital Universitario de Salamanca, IBSAL, CIBERONC, Salamanca, Spain; <sup>2</sup>Fondazione Italiana Linfomi (FIL) Onlus, Modena, Italy; <sup>3</sup>Hematology and Bone Marrow Transplant Unit, ASST Papa Giovanni XXIII, Bergamo, Italy; <sup>4</sup>Department of Statistics, Hospital Universitario de Salamanca / IBSAL, Salamanca, Spain; <sup>5</sup>Hematology Department, Hospital de la Santa Creu i Sant Pau, José Carreras Leukemia Research Institute and IIB Sant Pau, Barcelona, Spain; <sup>6</sup>Department of Hematology, Clínica Universidad de Navarra, IdiSNA, Pamplona, Spain; <sup>7</sup>Department of Translational and Precision Medicine, Sapienza University, Rome, Italy; <sup>8</sup>Department of Hematology, Son Espases University Hospital, IdISBa, Palma de Mallorca, Spain; <sup>9</sup>Department of Hematology, Hospital Clínic de Barcelona, Barcelona, Spain; <sup>10</sup>Hematology Department, Hospital Gregorio Marañón / IISGM, Madrid, Spain; <sup>11</sup>Hematology Department, ICO-IJC-Hospital Germans Trias i Pujol, Badalona, Spain; <sup>12</sup>Hematology Department, Hospital de Especialidades de Jerez de la Frontera, Cádiz, Spain; <sup>13</sup>Hematology Department, Hospital Clínico Universitario Virgen de la Arrixaca, Murcia, Spain; <sup>14</sup>Hematology Department, Hospital Universitario Virgen del Rocío, Seville, Spain; <sup>15</sup>Hematology Department, Hospital Universitario 12 de Octubre, Madrid, Spain; <sup>16</sup>Hematology Department, CIBERONC, Instituto Carlos III, Hospital Universitario y Politécnico La Fe, Valencia, Spain; <sup>17</sup>Hematology, Azienda Ospedaliero-Universitaria Città della Salute e della Scienza, Multidisciplinary Outpatient Oncology Clinic, Candiolo Cancer Institute, FPO-IRCCS, Candiolo (Torino), Italy; <sup>18</sup>Hematology Department, Hospital Universitario Reina Sofía, Cordoba, Spain; <sup>19</sup>Department of Translational Research, MD Anderson Cancer Center, Madrid, Spain; <sup>20</sup>Division of Hematology and Bone Marrow Transplantation, Fondazione IRCCS Istituto Nazionale dei Tumori, Milano, Italy; <sup>21</sup>Hematology Department, Hospital La Princesa, Madrid, Spain; <sup>22</sup>Department of Hematology, Complejo Hospitalario de León, León, Spain; <sup>23</sup>Hematology Department, Regional Hospital, Málaga, Spain; <sup>24</sup>Hematology Department, Hospital Universitario Ramón y Cajal, Madrid, Spain; <sup>25</sup>Division of Medical Oncology and Immune-related Tumors, Centro di Riferimento Oncologico di Aviano (CRO) IRCCS, Aviano, Italy; <sup>26</sup>Division of Hematology, ASST Spedali Civili di Brescia, Brescia, Italy; <sup>27</sup>Hematology Department, Hospital Universitario Marqués de Valdecilla, Santander, Spain; <sup>28</sup>Department of Hematology, University Hospital Vall d'Hebron and Universitat Autònoma de Barcelona, Barcelona, Spain and <sup>29</sup>Medical Oncology, CHIMOMO Department, University of Modena and Reggio Emilia, Modena, Italy.

**Correspondence:** A. M. García-Sancho  
[amartingar@usal.es](mailto:amartingar@usal.es)

**Received:** July 21, 2021.

**Accepted:** January 28, 2022.

**Prepublished:** March 24, 2022.

<https://doi.org/10.3324/haematol.2021.279426>

©2022 Ferrata Storti Foundation

Published under a CC BY-NC license

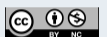

**Supplemental Table 1.** Univariate analysis of overall survival by subgroups

| Characteristic         | ASCT group |               | Non-ASCT group |               | p            |
|------------------------|------------|---------------|----------------|---------------|--------------|
|                        | N          | 5-year OS (%) | N              | 5-year OS (%) |              |
| Sex                    |            |               |                |               |              |
| Male                   | 62         | 76            | 42             | 59            | 0.099        |
| Female                 | 41         | 67            | 29             | 71            | 0.705        |
| Histological diagnosis |            |               |                |               |              |
| PTCL, NOS              | 41         | 73            | 26             | 56            | 0.431        |
| AITL                   | 31         | 70            | 17             | 57            | 0.324        |
| ALCL, ALK-negative     | 19         | 88            | 19             | 74            | 0.186        |
| Others                 | 12         | 62            | 9              | 66            | 0.809        |
| Age                    |            |               |                |               |              |
| ≤60 years              | 91         | 73            | 52             | 61            | 0.187        |
| >60 years              | 12         | 81            | 19             | 67            | 0.309        |
| ECOG-PS                |            |               |                |               |              |
| 0-1                    | 82         | 74            | 62             | 64            | 0.249        |
| 2-4                    | 20         | 74            | 7              | 57            | 0.251        |
| LDH                    |            |               |                |               |              |
| Normal                 | 44         | 69            | 42             | 66            | 0.434        |
| Increased              | 54         | 70            | 22             | 58            | 0.123        |
| <b>Ann-Arbor stage</b> |            |               |                |               |              |
| I-II                   | 16         | 94            | 35             | 74            | 0.315        |
| <b>III-IV</b>          | 86         | <b>70</b>     | 36             | <b>50</b>     | <b>0.028</b> |
| Extranodal sites       |            |               |                |               |              |
| 0-1                    | 83         | 75            | 59             | 67            | 0.272        |
| ≥2                     | 20         | 69            | 12             | 40            | 0.099        |
| BM infiltration        |            |               |                |               |              |
| Yes                    | 33         | 63            | 15             | 60            | 0.307        |
| No                     | 69         | 79            | 55             | 64            | 0.254        |
| B symptoms             |            |               |                |               |              |
| Yes                    | 51         | 71            | 28             | 51            | 0.057        |
| No                     | 52         | 76            | 39             | 69            | 0.649        |
| IPI                    |            |               |                |               |              |
| 0-1                    | 40         | 59            | 39             | 72            | 0.586        |
| 2-3                    | 48         | 71            | 22             | 67            | 0.234        |
| 4-5                    | 10         | 67            | 6              | 33            | 0.315        |
| PIT                    |            |               |                |               |              |
| 0-1                    | 66         | 78            | 53             | 63            | 0.207        |
| 2                      | 25         | 61            | 7              | 86            | 0.695        |
| 3-4                    | 11         | 79            | 7              | 43            | 0.114        |
| First-line treatment   |            |               |                |               |              |
| CHOP-like              | 68         | 76            | 58             | 62            | 0.072        |
| Others                 | 35         | 69            | 13             | 63            | 0.841        |
| Radiotherapy           |            |               |                |               |              |
| Yes                    | 3          | 33            | 19             | 68            | 0.184        |
| No                     | 100        | 75            | 52             | 60            | 0.082        |

Abbreviations: AITL, angioimmunoblastic T-cell lymphoma; ALCL, anaplastic large cell lymphoma; ASCT, autologous stem-cell transplantation; BM, bone marrow; CHOP, cyclophosphamide, doxorubicin, vincristine, and prednisolone; ECOG-PS, Eastern Cooperative Oncology Group Performance Status; IPI, International Prognostic Index; PIT, Prognostic Index for T-cell lymphoma; PTCL, NOS, peripheral T-cell lymphoma, not otherwise specified; OS, overall survival.

**Supplemental Table 2.** Separate analysis of patients in partial response after first line

| Characteristic                               | Missing<br>N | ASCT<br>N (%)         | Non-ASCT<br>N (%)    | p     |
|----------------------------------------------|--------------|-----------------------|----------------------|-------|
| Total number of evaluable patients           |              | 15                    | 23                   |       |
| Male sex                                     | 0            | 14 (93.3)             | 18 (78.3)            | 0.213 |
| Age, years, median (range)                   | 0            | 55 (31-63)            | 45 (27-63)           | 0.300 |
| Older than 60                                |              | 4 (26.7)              | 5 (21.7)             | 0.727 |
| Histological diagnosis                       | 0            |                       |                      |       |
| Peripheral T-cell lymphoma, NOS              |              | 5 (33.3)              | 11 (47.8)            | 0.220 |
| Angioimmunoblastic T-cell lymphoma           |              | 2 (13.3)              | 8 (34.8)             |       |
| Anaplastic large cell lymphoma, ALK-negative |              | 5 (33.3)              | 3 (13.0)             |       |
| Enteropathy-associated T-cell lymphoma       |              | 1 (6.7)               | 4 (4.3)              |       |
| Hepatosplenic T-cell lymphoma                |              | 2 (13.3)              | 0                    |       |
| ECOG performance status 2-4                  | 0            | 5 (33.3)              | 9 (39.1)             | 0.717 |
| Ann-Arbor stage III-IV                       | 2            | 14 (93.3)             | 20 (95.2)            | 0.806 |
| LDH increased                                | 2            | 9 (60.0)              | 14 (66.7)            | 0.681 |
| Bone marrow infiltration                     | 2            | 4 (26.7)              | 11 (47.8)            | 0.192 |
| IPI                                          | 4            |                       |                      |       |
| 0-1                                          |              | 2 (13.3)              | 1 (5.3)              | 0.748 |
| 2-3                                          |              | 8 (53.4)              | 12 (63.2)            |       |
| 4-5                                          |              | 5 (33.3)              | 6 (31.6)             |       |
| PIT                                          | 2            |                       |                      |       |
| 0-1                                          |              | 9 (60.0)              | 8 (38.1)             | 0.289 |
| 2                                            |              | 2 (13.3)              | 2 (13.3)             |       |
| 3-4                                          |              | 4 (26.7)              | 4 (19.0)             |       |
| First-line treatment                         | 0            |                       |                      |       |
| CHOP or CHOP-like                            |              | 6 (40.0)              | 19 (82.6)            | 0.155 |
| CHOEP or CHOEP-like                          |              | 2 (13.3)              | 0                    |       |
| MACOP-B or VACOP-B                           |              | 1 (6.7)               | 2 (8.7)              |       |
| CHOP-like alternating with others            |              | 5 <sup>1</sup> (33.3) | 1 <sup>2</sup> (4.3) |       |
| Others                                       |              | 1 <sup>3</sup> (6.7)  | 1 <sup>4</sup> (4.3) |       |
| Radiotherapy as part of first-line           | 0            | 0                     | 0                    | -     |

<sup>1</sup>ESHAP (n=4), Hyper-CHiDAM (n=1)

<sup>2</sup>ESHAP (n=1)

<sup>3</sup>ESHAP (n=1),

<sup>4</sup>IVE-MTX-dexamethasone (n=1),

Abbreviations: ASCT, autologous stem-cell transplantation performed after the first-line; CHOP, cyclophosphamide, doxorubicin, vincristine, and prednisolone; ECOG, Eastern Cooperative Oncology Group; ESHAP, etoposide, solumedrol, cytarabine, and cisplatin; HDMTX, high-dose methotrexate; Hyper-CHiDAM, hyperfractionated cyclophosphamide, high-dose arabinosylcytosine, and high-dose methotrexate; IPI, International Prognostic Index; IVE-MTX, ifosfamide, epirubicin, etoposide, and methotrexate; MACOP-B, methotrexate, doxorubicin, cyclophosphamide, vincristine, prednisone, and bleomycin; PIT, Prognostic Index for T-cell lymphoma; VACOP-B, etoposide, doxorubicin, cyclophosphamide, vincristine, prednisone, and bleomycin.

**Supplemental Figure 1.** Separate analysis of patients in partial response after the 1<sup>st</sup> line: Kaplan–Meier estimation of progression-free survival (A) and overall survival (B) in the autologous stem-cell transplantation (ASCT) and non-ASCT cohorts

A)

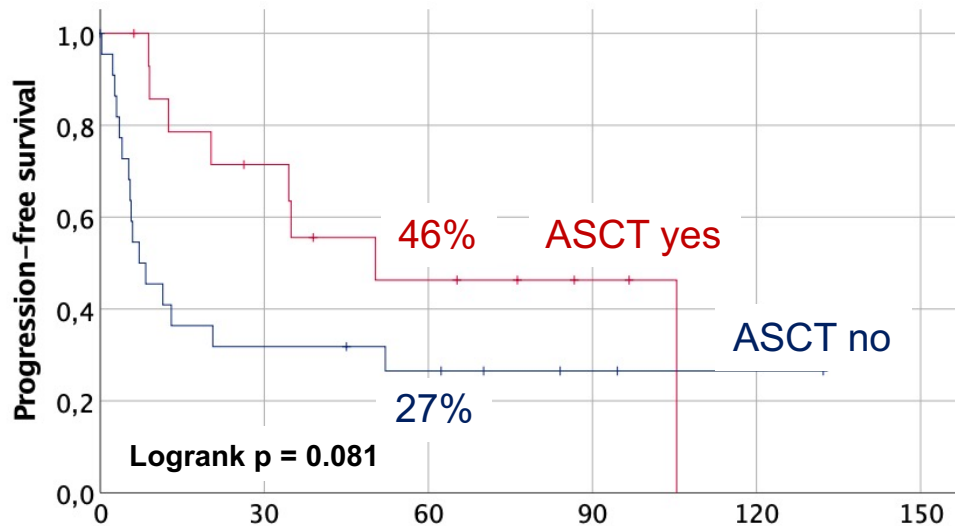

| No. at risk | Months |    |    |    |     |     |
|-------------|--------|----|----|----|-----|-----|
|             | 0      | 30 | 60 | 90 | 120 | 150 |
| ASCT        | 15     | 9  | 5  | 2  | 0   | 0   |
| Non-ASCT    | 23     | 7  | 5  | 2  | 1   | 0   |

B)

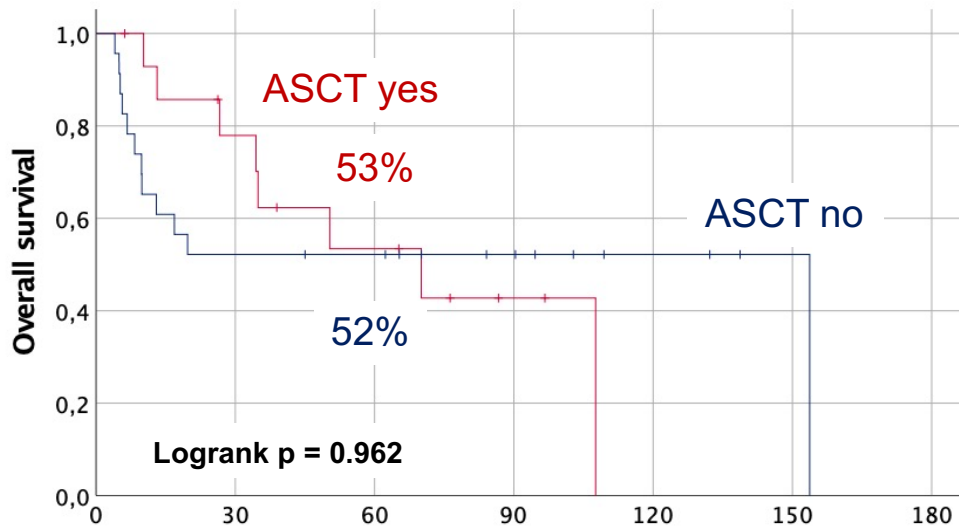

| No. at risk | Months |    |    |    |     |     |     |
|-------------|--------|----|----|----|-----|-----|-----|
|             | 0      | 30 | 60 | 90 | 120 | 150 | 180 |
| ASCT        | 15     | 10 | 6  | 2  | 0   | 0   | 0   |
| Non-ASCT    | 23     | 12 | 11 | 6  | 3   | 1   | 0   |
